# Supplementary material
Source: PubMed Central journal article supplement (PMC5533213)
Supplement: NIHMS70752-supplement-Supplementary_Figure_1.pdf [file NIHMS70752-supplement-Supplementary_Figure_1.pdf]

### (a) week 36 by pre-ART viral load

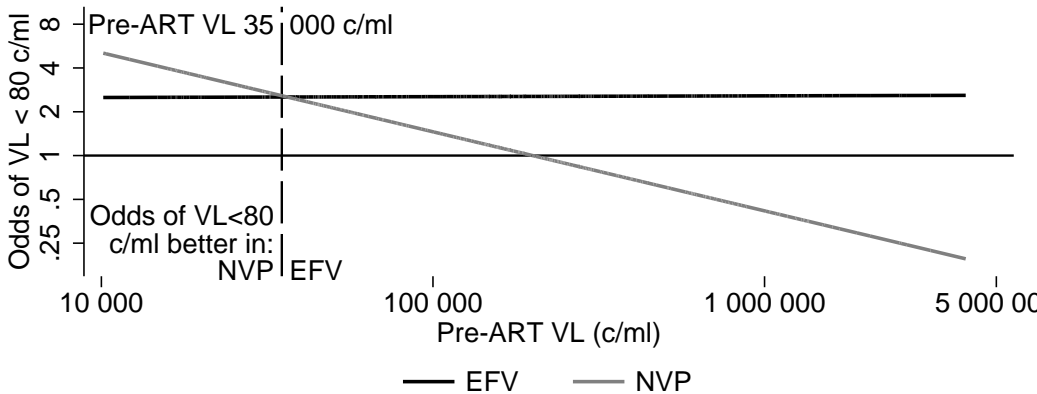

Reference category: Zimbabwean child aged 5-9 years, on NVP; with pre-ART VL 200 000 c/ml

### (b) week 48 by pre-ART viral load

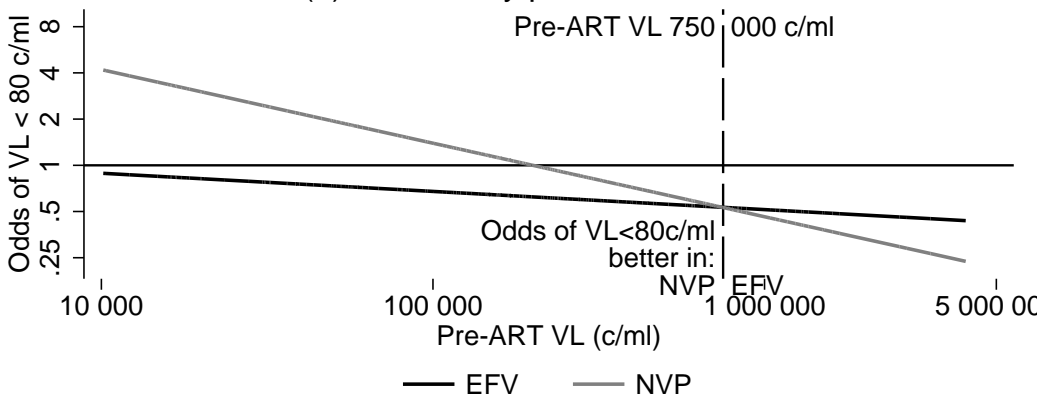

Reference category: child aged 5-9 years, on NVP; with pre-ART VL 200 000 c/ml and no reported missed ART doses

### (c) week 144 by age at ART initiation

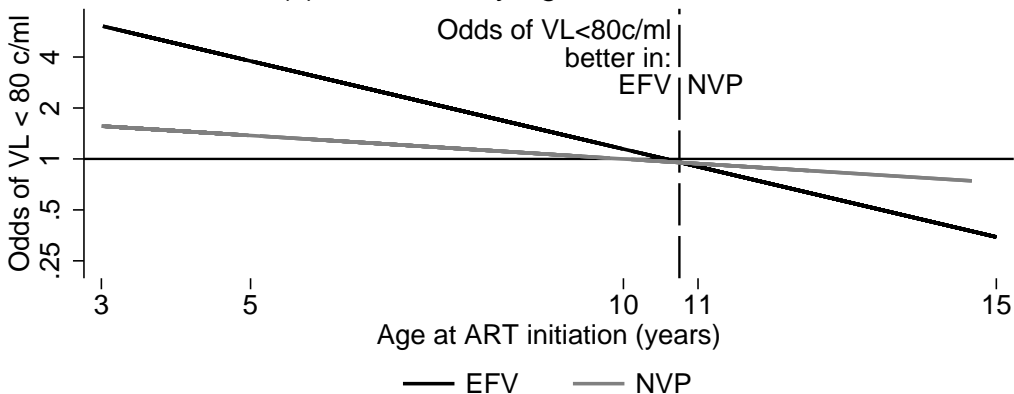

Reference category: child aged 10 at ART initiation, on NVP in Arm A (NNRTI+3TC+ABC); with pre-ART VL 200 000 c/ml and no reported missed ART doses
