# Supplementary material
Source: PubMed Central journal article supplement (PMC5533213)
Supplement: NIHMS70752-supplement-Supplementary_Table_1.pdf [file NIHMS70752-supplement-Supplementary_Table_1.pdf]

Supplementary Table 1 Independent predictors of viral load suppression &lt;80, &lt;400 and &lt;1000 copies/ml at 36, 48 and 144 weeks after ART initiation

| Factor                                                                    | 36 weeks (n=314, Arms A/B/C) |        |                     |       |                     |        | 48 weeks (n=213, Arms A/B) |      |                     |       |                     |      | 144 weeks (n=221, Arms A/B) |        |                       |        |                       |        |  |
|---------------------------------------------------------------------------|------------------------------|--------|---------------------|-------|---------------------|--------|----------------------------|------|---------------------|-------|---------------------|------|-----------------------------|--------|-----------------------|--------|-----------------------|--------|--|
|                                                                           | <80 copies/ml                |        | <400 copies/ml      |       | <1000 copies/ml     |        | <80 copies/ml              |      | <400 copies/ml      |       | <1000 copies/ml     |      | <80 copies/ml               |        | <400 copies/ml        |        | <1000 copies/ml       |        |  |
|                                                                           | aOR [95% CI]                 | P      | aOR [95% CI]        | P     | aOR [95% CI]        | p      | aOR [95% CI]               | P    | aOR [95% CI]        | p     | aOR [95% CI]        | P    | aOR [95% CI]                | P      | aOR [95% CI]          | p      | aOR [95% CI]          | P      |  |
| VL at ART initiation                                                      |                              |        |                     |       |                     |        |                            |      |                     |       |                     |      |                             |        |                       |        |                       |        |  |
| Per log <sub>10</sub> higher if taking efavirenz                          | 1.01<br>[0.58-1.76]          | 0.96   | 0.83<br>[0.38-1.82] | 0.64  | 0.88<br>[0.39-1.98] | 0.75   | 0.76<br>[0.39-1.49]        | 0.42 | 0.96<br>[0.38-2.41] | 0.93  | 0.74<br>[0.24-2.27] | 0.60 | 0.59<br>[0.35-1.00]         | 0.05   | 0.35<br>[0.17-0.70]   | 0.003  | 0.34<br>[0.16-0.72]   | 0.005  |  |
| Per log <sub>10</sub> higher if taking nevirapine                         | 0.29<br>[0.15-0.56]          | <0.001 | 0.33<br>[0.14-0.79] | 0.01  | 0.24<br>[0.08-0.68] | 0.007  | 0.33<br>[0.13-0.86]        | 0.02 | 0.21<br>[0.06-0.76] | 0.02  | 0.21<br>[0.06-0.77] | 0.02 |                             |        |                       |        |                       |        |  |
| Heterogeneity                                                             |                              | 0.003  |                     | 0.11  |                     | 0.04   |                            | 0.15 |                     | 0.05  |                     | 0.13 |                             |        |                       |        |                       |        |  |
| Efavirenz, vs. nevirapine if VL 200,000 copies/ml at ART initiation       | 2.55<br>[1.29-5.03]          | 0.007  | 2.29<br>[0.86-6.07] | 0.097 | 1.81<br>[0.59-5.54] | 0.30   | 0.62<br>[0.27-1.43]        | 0.27 | 0.92<br>[0.27-3.14] | 0.90  | 1.28<br>[0.35-4.61] | 0.71 |                             |        |                       |        |                       |        |  |
| Efavirenz, vs. nevirapine if aged 10 years at ART initiation              |                              |        |                     |       |                     |        |                            |      |                     |       |                     |      | 1.14<br>[0.43-3.08]         | 0.79   | 1.19<br>[0.38-3.74]   | 0.76   | 1.12<br>[0.34-3.75]   | 0.85   |  |
| Age at ART initiation                                                     |                              |        |                     |       |                     |        |                            |      |                     |       |                     |      |                             |        |                       |        |                       |        |  |
| Per year older if taking efavirenz                                        |                              |        |                     |       |                     |        |                            |      |                     |       |                     |      | 0.79<br>[0.69-0.90]         | <0.001 | 0.74<br>[0.64-0.87]   | <0.001 | 0.72<br>[0.61-0.85]   | <0.001 |  |
| Per year older if taking nevirapine                                       |                              |        |                     |       |                     |        |                            |      |                     |       |                     |      | 0.94<br>[0.79-1.11]         | 0.46   | 0.88<br>[0.72-1.08]   | 0.23   | 0.85<br>[0.69-1.06]   | 0.14   |  |
| Heterogeneity                                                             |                              |        |                     |       |                     |        |                            |      |                     |       |                     |      | 0.09                        |        | 0.15                  |        | 0.19                  |        |  |
| Age at ART initiation, vs 5-9years                                        |                              | 0.02   |                     | 0.003 |                     | 0.0006 |                            | 0.09 |                     | 0.009 |                     | 0.03 |                             |        |                       |        |                       |        |  |
| 3-4                                                                       | 0.73<br>[0.36-1.46]          | 0.37   | 0.94<br>[0.33-2.67] | 0.91  | 0.92<br>[0.27-3.11] | 0.89   | 0.47<br>[0.19-1.15]        | 0.10 | 0.37<br>[0.09-1.55] | 0.17  | 0.48<br>[0.11-2.07] | 0.32 |                             |        |                       |        |                       |        |  |
| 10+                                                                       | 0.34<br>[0.16-0.73]          | 0.006  | 0.22<br>[0.08-0.61] | 0.004 | 0.16<br>[0.05-0.50] | 0.002  | 0.38<br>[0.14-1.00]        | 0.05 | 0.12<br>[0.03-0.53] | 0.005 | 0.15<br>[0.03-0.68] | 0.01 |                             |        |                       |        |                       |        |  |
| 3TC/ABC/NNRTI throughout (Arm A), vs additional 36 weeks ZDV induction*   |                              |        |                     |       |                     |        |                            |      |                     |       |                     |      | 0.52**<br>[0.27-1.00]       | 0.05   | 0.39**<br>[0.18-0.85] | 0.02   | 0.33**<br>[0.14-0.78] | 0.01   |  |
| Missed any doses in last 4 weeks, vs not missed any doses                 |                              |        |                     |       |                     |        |                            |      |                     |       |                     |      | 0.51<br>[0.17-1.52]         | 0.23   | 0.33<br>[0.11-1.01]   | 0.05   | 0.37<br>[0.11-1.17]   | 0.09   |  |
| % visits to date with missed doses in last 4 weeks (per 10% higher)       |                              |        |                     |       |                     |        | 0.76<br>[0.57-1.00]        | 0.05 | 0.72<br>[0.50-1.03] | 0.07  | 0.69<br>[0.48-1.00] | 0.05 | 0.84<br>[0.59-1.21]         | 0.36   | 0.70<br>[0.47-1.05]   | 0.08   | 0.62<br>[0.40-0.95]   | 0.03   |  |
| Centre, vs. A                                                             |                              | 0.47   |                     | 0.07  |                     | 0.002  |                            |      |                     |       |                     |      |                             |        |                       |        |                       |        |  |
| B                                                                         | 1.00<br>[0.45, 2.25]         | 0.99   | 0.47<br>[0.16-1.41] | 0.18  | 0.19<br>[0.05-0.73] | 0.02   |                            |      |                     |       |                     |      |                             |        |                       |        |                       |        |  |
| C                                                                         | 0.58<br>[0.28-1.23]          | 0.16   | 0.29<br>[0.10-0.83] | 0.02  | 0.15<br>[0.04-0.54] | 0.004  |                            |      |                     |       |                     |      |                             |        |                       |        |                       |        |  |
| D                                                                         | 0.69<br>[0.31-1.49]          | 0.34   | 0.85<br>[0.25-2.93] | 0.80  | 0.72<br>[0.14-3.62] | 0.69   |                            |      |                     |       |                     |      |                             |        |                       |        |                       |        |  |
| Overall efavirenz vs nevirapine (incorporating interaction effects above) |                              | 0.0004 |                     | 0.07  |                     | 0.07   |                            | 0.26 |                     | 0.15  |                     | 0.25 |                             | 0.05   |                       | 0.12   |                       | 0.22   |  |
| Hosmer-Lemeshow goodness-of-fit***                                        |                              | 0.56   |                     | 0.89  |                     | 0.85   |                            | 0.70 |                     | 0.93  |                     | 0.37 |                             | 0.60   |                       | 0.94   |                       | 0.43   |  |

Predictors of viral load suppression &lt;80 copies/ml as per Table 2

aOR=adjusted odds ratio, n=n complete cases

\*Only including Arm A/B receiving long-term NNRTIs from week 48 onwards. At 36 weeks, children in both Arm B and C had both received 36 weeks 3TC/ABC/ZDV/NNRTI, and were therefore pooled in analysis.

\*\* There was no evidence of interaction between NNRTI and allocated ART strategy (p&gt;0.1).

\*\*\* Calculated using 10 groups. p&gt;0.05 indicates good model fit.
